# Supplementary material for: Pre-Clinical Investigations of the Pharmacodynamics of Immunogenic Smart Radiotherapy Biomaterials (iSRB)
Source: MDPI journal article supplement (doi:10.3390/pharmaceutics15122778), 2023-12-14
Supplement: s1 [file s1]

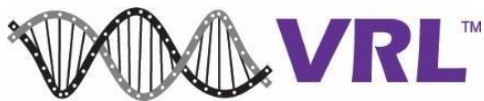

VRL – Maryland, LLC  
 401 Professional Drive, Suite 210  
 Gaithersburg, MD 20879  
 Phone: 1-800-804-3586

Date: 20 October 2023

Client: Johns Hopkins University

Pathologist: Dr. Dan Ragland

### HISTOPATHOLOGY REPORT for Male Mice

Table S7.

| Mouse Accession                                                                                                                                                                                                                             | 23022781              | 23022782              | 23022783              | 23022784              | 23022785            | 23022786              |
|---------------------------------------------------------------------------------------------------------------------------------------------------------------------------------------------------------------------------------------------|-----------------------|-----------------------|-----------------------|-----------------------|---------------------|-----------------------|
| Animal ID                                                                                                                                                                                                                                   | No Treatment #1-D45   | No Treatment #2-D45   | No Treatment #3-D45   | No Treatment #4-D45   | No Treatment #5-D45 | iSRB_Anti-CD40 #1-D45 |
| LIVER                                                                                                                                                                                                                                       | N                     |                       |                       | N                     |                     |                       |
| <b>Microabscesses:</b> Mixed aggregates of inflammatory cells consisting primarily of neutrophils and fewer macrophages and/or lymphocytes, with one or more swollen and degenerating hepatocytes incorporated into the inflammatory focus. |                       |                       |                       |                       |                     | 2MF                   |
| <b>Microgranulomas:</b> Mixed aggregates of inflammatory cells consisting of up to 100 lymphocytes, macrophages, random neutrophils, and a small number of incorporated hepatocytes that are often swollen and or degenerate.               |                       |                       | 1MF                   |                       | 2MF                 |                       |
| <b>Lymphocytic aggregates:</b> Aggregates of purely lymphocytes, up to 100 cells, located in perivascular and parenchymal locations throughout the liver.                                                                                   |                       | 2MF                   |                       |                       |                     |                       |
| KIDNEY: RIGHT                                                                                                                                                                                                                               | N                     | N                     | N                     | N                     | N                   | N                     |
| KIDNEY: LEFT                                                                                                                                                                                                                                | N                     | N                     | N                     | N                     | N                   | N                     |
| Mouse Accession                                                                                                                                                                                                                             | 23022787              | 23022788              | 23022789              | 23022790              |                     |                       |
| Animal ID                                                                                                                                                                                                                                   | iSRB_Anti-CD40 #2-D45 | iSRB_Anti-CD40 #3-D45 | iSRB_Anti-CD40 #4-D45 | iSRB_Anti-CD40 #5-D45 |                     |                       |
| LIVER                                                                                                                                                                                                                                       | N                     |                       |                       |                       |                     |                       |
| <b>Lymphocytic aggregates:</b> Collections of purely lymphocytes, up to 100 cells, located in perivascular and random parenchymal locations throughout the liver.                                                                           |                       |                       |                       |                       |                     |                       |
| <b>Microgranulomas:</b> Mixed aggregates of inflammatory cells consisting of up to 100 cells, of lymphocytes, macrophages, random neutrophils, and a small number of incorporated hepatocytes that are often swollen and or degenerate.     |                       | 1MF                   | 1MF                   | 1MF                   |                     |                       |
| <b>Microabscesses:</b> Mixed aggregates of inflammatory cells consisting primarily of neutrophils and fewer macrophages and/or lymphocytes, with one or more swollen and degenerating hepatocytes incorporated into the inflammatory focus. |                       |                       |                       |                       |                     |                       |
| KIDNEY: RIGHT                                                                                                                                                                                                                               | N                     | N                     | N                     | N                     |                     |                       |
| KIDNEY: LEFT                                                                                                                                                                                                                                | N                     | N                     |                       | N                     |                     |                       |

|                                                                                                                                                                                                                                                                                                                                                                                                                                                                                            |  |  |    |  |  |  |  |
|--------------------------------------------------------------------------------------------------------------------------------------------------------------------------------------------------------------------------------------------------------------------------------------------------------------------------------------------------------------------------------------------------------------------------------------------------------------------------------------------|--|--|----|--|--|--|--|
| <b>End Stage Kidney/hydronephrosis:</b> There is diffuse degeneration of renal tissue throughout the cortex, medulla, and pelvis. The pelvis is markedly dilated and is compressing the cortex to approximately half its original thickness. Renal tubules are diffusely dilated and contain intraluminal hyaline casts or necrotic tubular epithelial cells. The peripelvic suburothelium is expanded by lytic necrosis and infiltrates of neutrophils, lymphocytes, and cellular debris. |  |  | 5D |  |  |  |  |
|--------------------------------------------------------------------------------------------------------------------------------------------------------------------------------------------------------------------------------------------------------------------------------------------------------------------------------------------------------------------------------------------------------------------------------------------------------------------------------------------|--|--|----|--|--|--|--|

#### Scoring Definitions:

0= No finding      1= Minimal      2= Mild      3= Moderate      4= Marked      5= Severe  
 N= Normal      M= Missing      MF=Multifocal      F=Focal      D=Diffuse      U=Unilateral  
 B=Bilateral

Table S7. Pathology report corresponding to day forty-five post-treatment from harvested liver and kidney tissues.

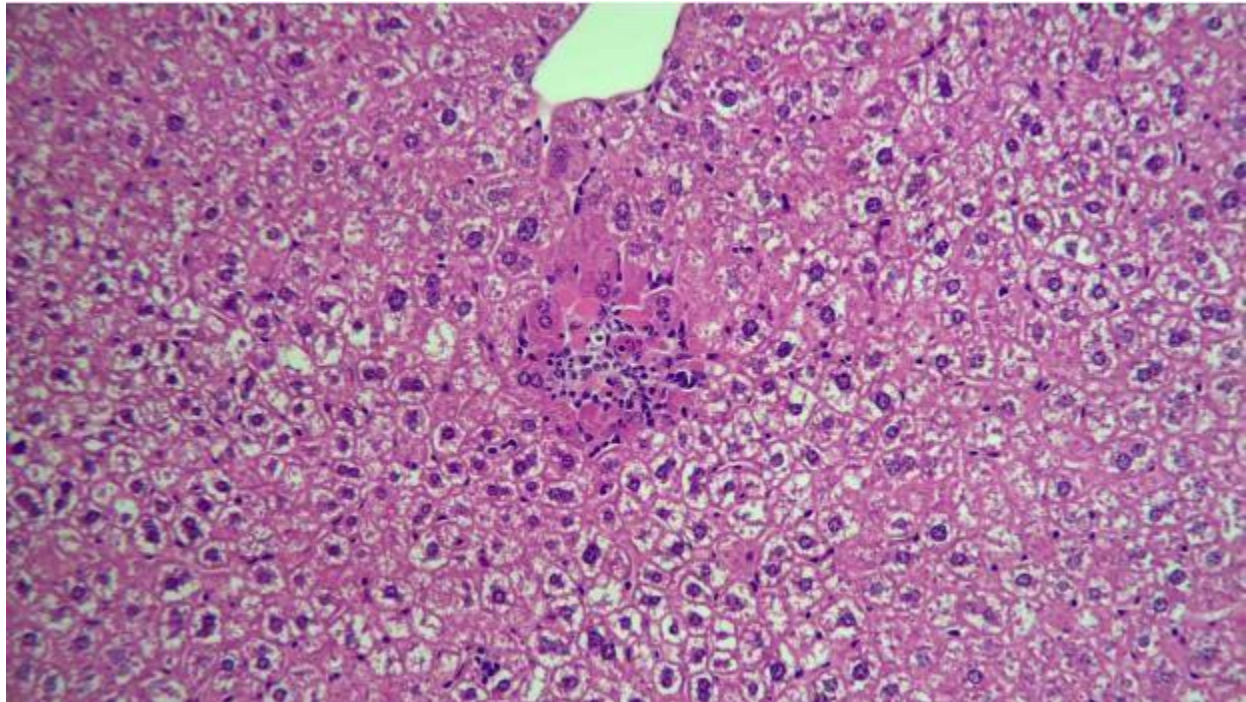

**Mouse 23022783 liver showing representative microgranuloma. 200X**

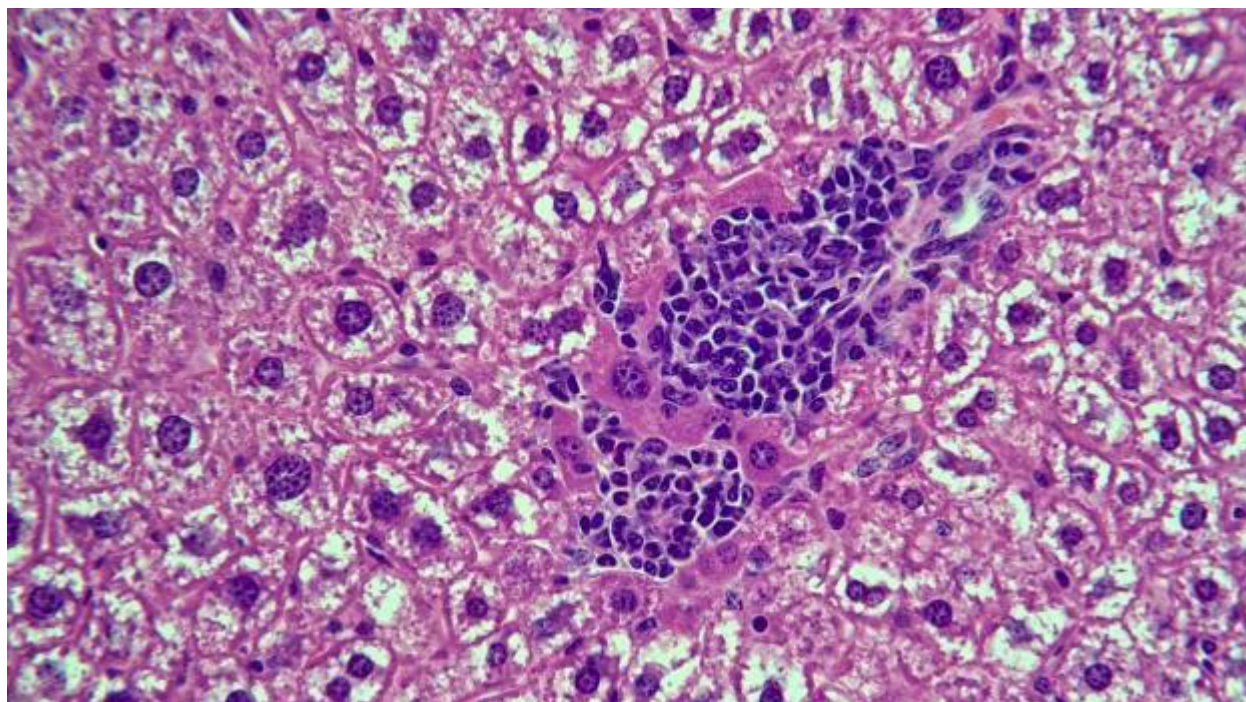

**Mouse 23022785 liver showing representative microgranuloma. 400X**

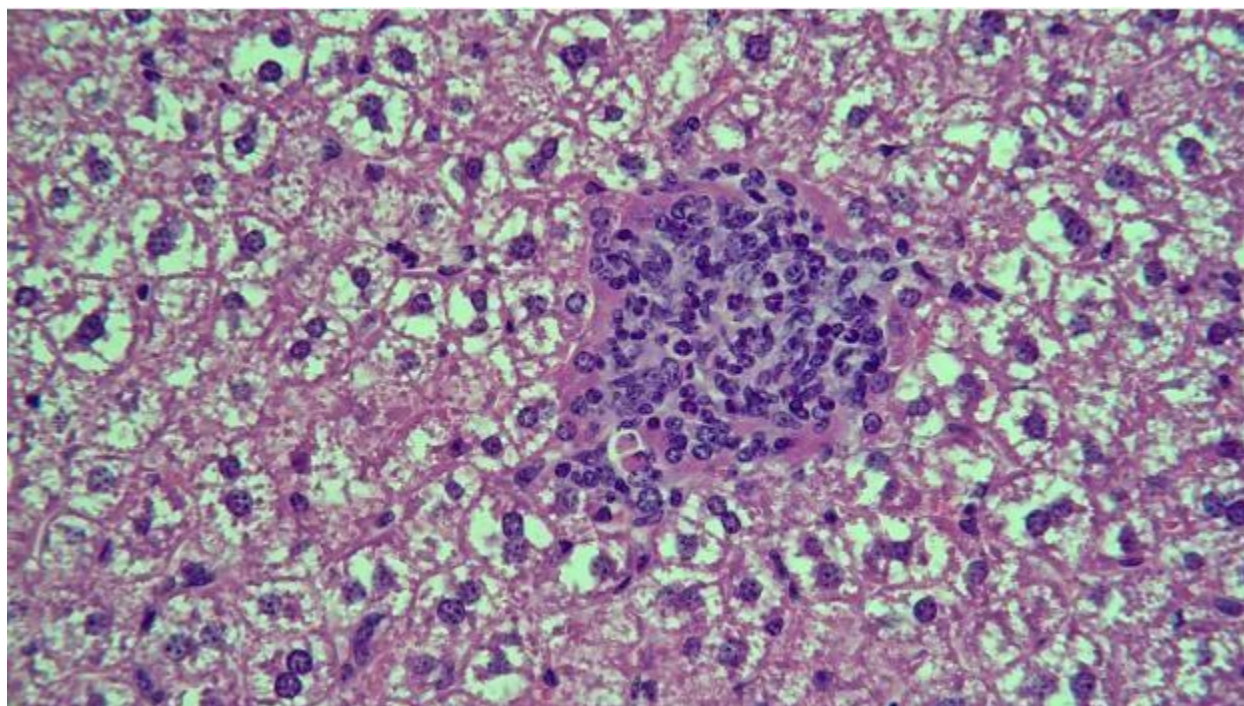

**Mouse 23022786 liver showing representative microabscess. 400X**

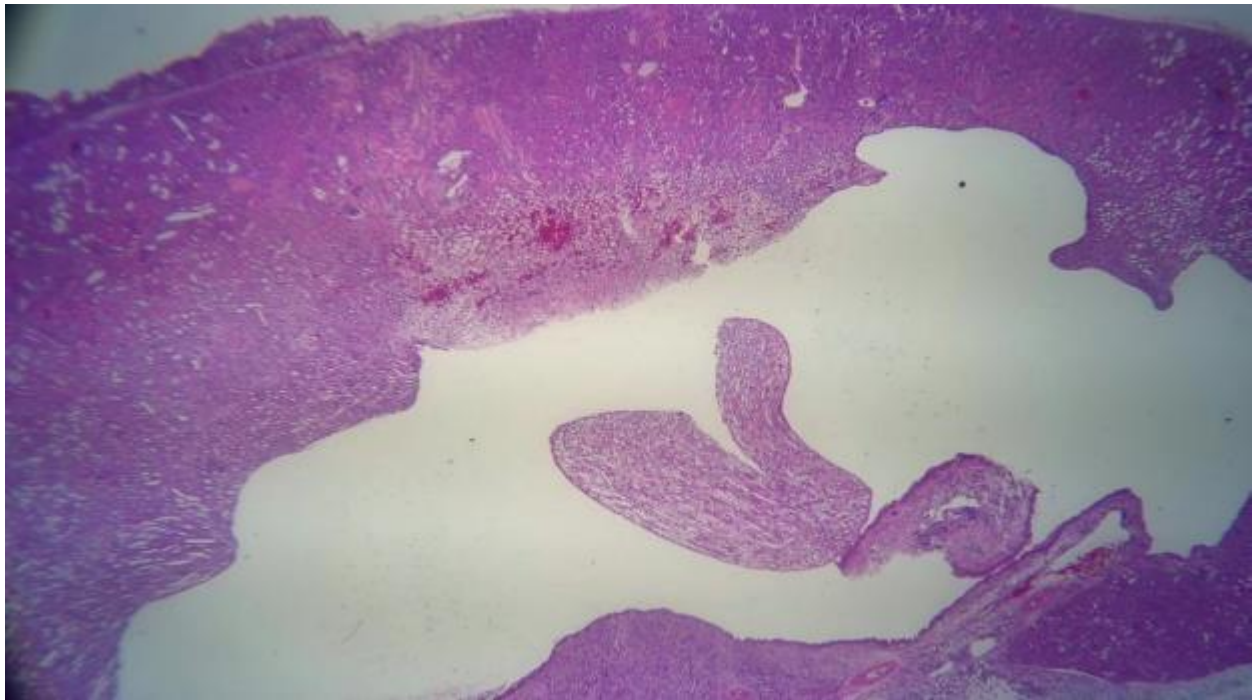

Mouse 23022789 kidney showing severe unilateral hydronephrosis and end stage degeneration. 20X
